# Supplementary material for: Extraction and Analysis of Spatial Feature Data of Traditional Villages Based on the Unmanned Aerial Vehicle (UAV) Image
Source: Hindawi journal article supplement (doi:10.1155/2022/4663740), 2022-12-26
Supplement: f1 [file 4663740.f1.docx]

Table S1. UAV-SfM model accuracy assessment GCPs.

| GCP | Field Survey Date | | | Deviation | | |
| --- | --- | --- | --- | --- | --- | --- |
| X [m] | Y [m] | Z [m] | dX [m] | dY [m] | dZ [m] |
| 1 | 3306604.882 | 628127.523 | 144.956 | 0.0278 | 0.0132 | 0.0364 |
| 2 | 3306506.046 | 628133.445 | 145.049 | 0.0221 | -0.0322 | 0.0563 |
| 4 | 3306553.232 | 628183.857 | 144.350 | 0.0136 | -0.0339 | 0.0390 |
| 5 | 3306606.683 | 628209.659 | 142.573 | 0.0211 | 0.0216 | 0.0298 |
| 8 | 3306517.052 | 628267.260 | 143.946 | -0.0153 | 0.0262 | 0.0301 |
| 9 | 3306549.036 | 628293.181 | 143.780 | 0.0142 | -0.0247 | 0.0216 |
| 10 | 3306625.117 | 628302.503 | 143.809 | -0.0132 | -0.0186 | 0.0336 |
| 12 | 3306621.834 | 628361.245 | 143.822 | 0.0198 | -0.0093 | -0.0326 |
| 13 | 3306520.474 | 628381.772 | 144.243 | -0.0265 | 0.0193 | 0.0271 |
| 14 | 3306576.790 | 628391.880 | 142.887 | 0.0187 | -0.0424 | -0.0421 |
| 16 | 3306475.324 | 628444.030 | 144.557 | 0.0233 | 0.0389 | 0.0365 |
| 17 | 3306577.985 | 628451.424 | 144.107 | 0.0154 | -0.0424 | 0.0521 |
| 19 | 3306505.447 | 628495.648 | 143.240 | 0.0127 | 0.0256 | 0.0362 |
| 21 | 3306475.327 | 628574.680 | 142.567 | 0.0113 | -0.0321 | -0.0421 |
| 22 | 3306591.681 | 628584.648 | 144.438 | 0.0232 | 0.0063 | 0.0285 |
| 23 | 3306717.705 | 628579.023 | 142.489 | 0.0245 | -0.0225 | 0.0432 |
| 24 | 3306543.807 | 628633.973 | 142.440 | 0.0149 | 0.0127 | 0.0321 |
| 26 | 3306666.276 | 628681.263 | 141.232 | -0.0234 | 0.0199 | -0.0320 |
| 27 | 3306701.552 | 628692.350 | 141.595 | 0.0157 | 0.0214 | 0.0475 |
| 28 | 3306600.302 | 628734.186 | 140.626 | 0.0247 | -0.0258 | 0.0465 |
| 29 | 3306672.207 | 628750.673 | 142.542 | 0.0214 | -0.0354 | -0.0542 |
| 31 | 3306669.742 | 628831.979 | 141.635 | 0.0232 | 0.0265 | 0.0354 |
| 32 | 3306756.769 | 628873.764 | 140.996 | 0.0298 | -0.0164 | 0.0425 |
| 33 | 3306727.940 | 628901.422 | 140.027 | 0.0194 | -0.0221 | 0.0459 |
| 35 | 3306715.103 | 629003.906 | 139.864 | 0.0271 | 0.0297 | -0.0397 |
| RMSE H = sqrt ((sum(dX)2 +(sum(dY)2)/n) | | | | 0.034m |  |  |
|  |  |
| RMSE V= sqrt (sum(dZ)2/n) | | | | 0.039m |  |  |

Table S2. UAV-SfM model accuracy assessment CPs.

| CP | Field Survey Date | | | Deviation | | |
| --- | --- | --- | --- | --- | --- | --- |
| X [m] | Y [m] | Z [m] | dX [m] | dY [m] | dZ [m] |
| 3 | 3306573.684 | 628161.547 | 139.827 | -0.0493 | 0.0093 | 0.0389 |
| 6 | 3306532.087 | 628223.224 | 140.526 | -0.0196 | 0.0138 | -0.0563 |
| 7 | 3306571.662 | 628254.978 | 139.746 | 0.0104 | 0.0425 | 0.0390 |
| 11 | 3306511.330 | 628306.318 | 142.703 | 0.0028 | 0.0198 | 0.0341 |
| 15 | 3306552.261 | 628419.835 | 140.595 | -0.0236 | 0.0255 | 0.0456 |
| 18 | 3306464.882 | 628485.256 | 139.279 | 0.0313 | -0.0245 | 0.0345 |
| 20 | 3306532.416 | 628559.307 | 145.027 | 0.0217 | 0.0019 | -0.0275 |
| 25 | 3306625.598 | 628679.302 | 143.455 | -0.0313 | -0.0433 | 0.0360 |
| 30 | 3306673.751 | 628797.059 | 143.788 | 0.0021 | -0.0231 | -0.0463 |
| 34 | 3306730.898 | 628956.057 | 142.819 | 0.0211 | 0.0261 | 0.0285 |
| RMSE H = sqrt ((sum(dX)2 +(sum(dY)2)/n) | | | | 0.036m |  |  |
|  |  |
| RMSE V= sqrt (sum(dZ)2/n) | | | | 0.040m |  |  |
